# Supplementary material for: Effect of gluten-free diet and antibiotics on murine gut microbiota and immune response to tetanus vaccination
Source: PLOS journal article supplement (doi:10.1371/journal.pone.0266719), 2022-04-13

A

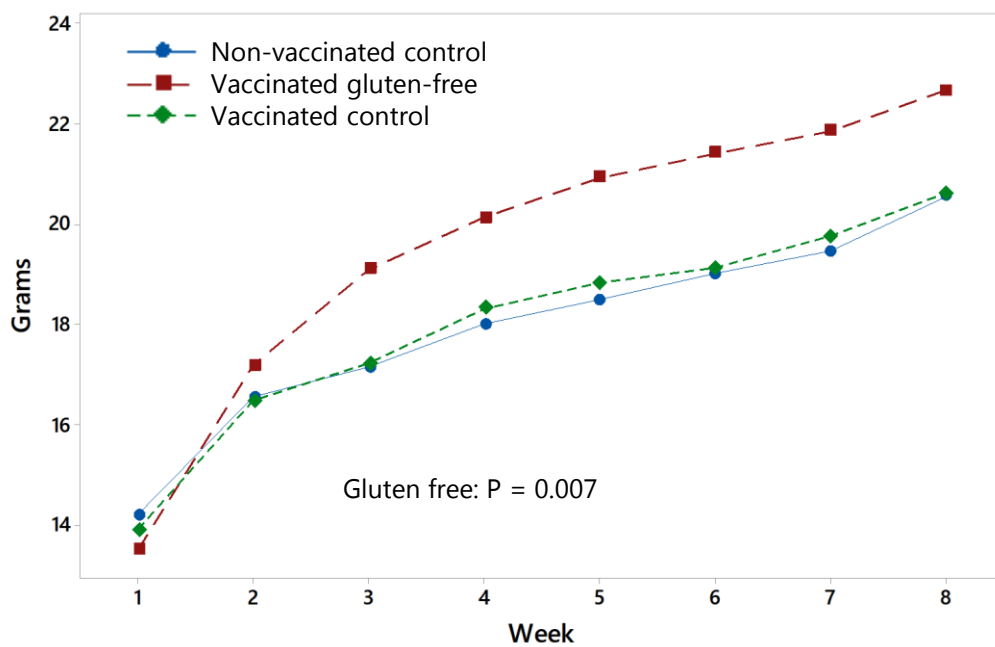

B

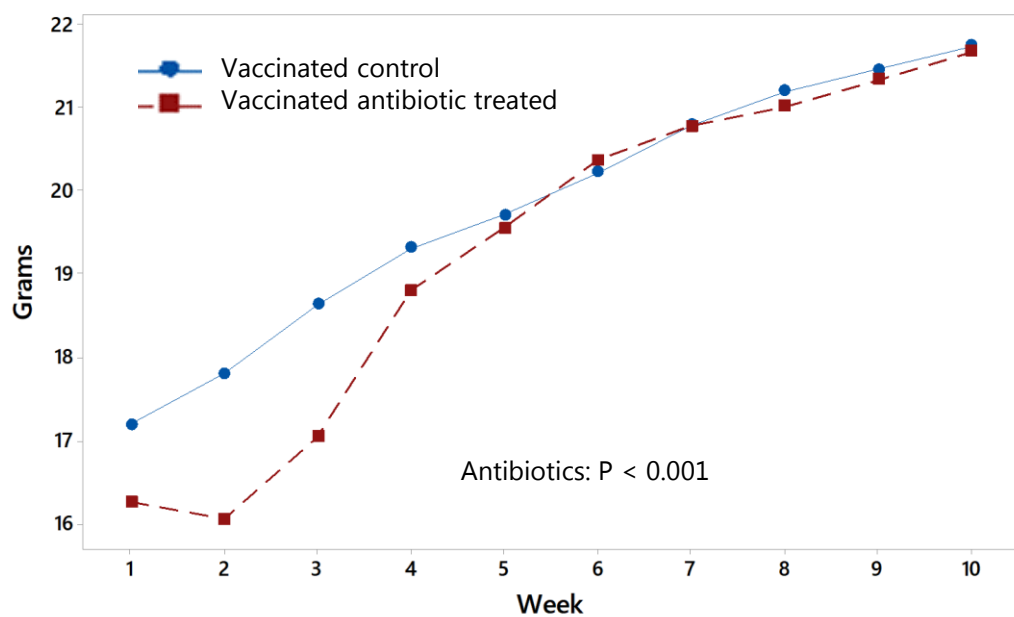

Supplement: S1 (10.1371/journal.pone.0266719.s001) [file journal.pone.0266719.s001]
